# Supplementary material for: A role for non-coding Tsix transcription in partitioning chromatin domains within the mouse X-inactivation centre
Source: PubMed Central journal article supplement (PMC2720958; doi:10.1186/1756-8935-2-8), 2009-07-20

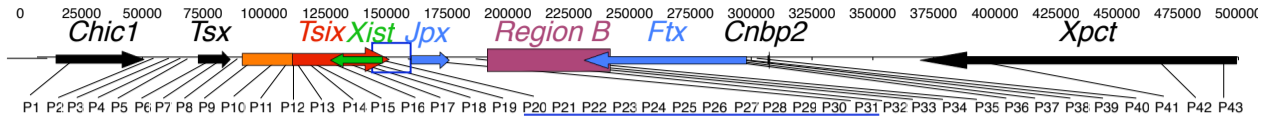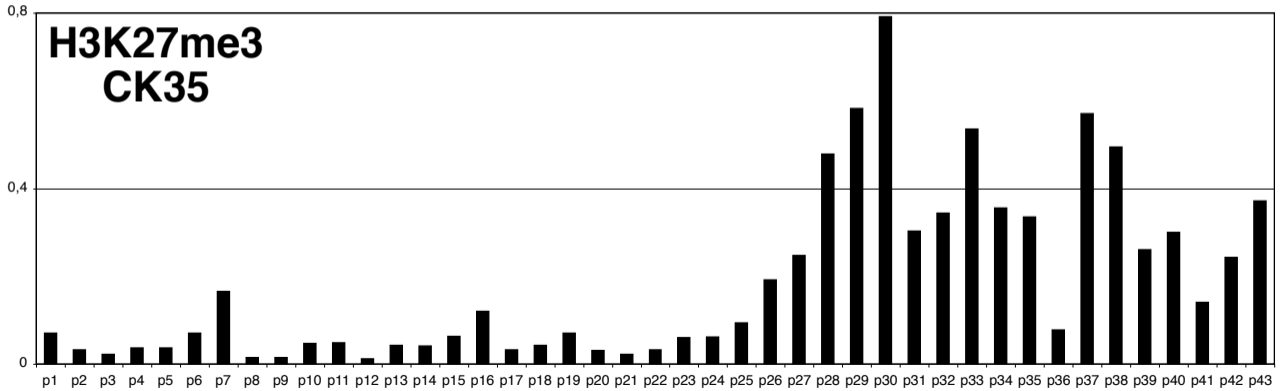

Supplement: 1756-8935-2-8-S1.pdf [file 1756-8935-2-8-S1.pdf]
