# Supplementary material for: A role for non-coding Tsix transcription in partitioning chromatin domains within the mouse X-inactivation centre
Source: PubMed Central journal article supplement (PMC2720958; doi:10.1186/1756-8935-2-8), 2009-07-20

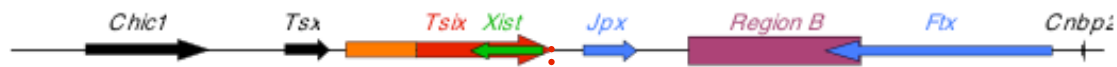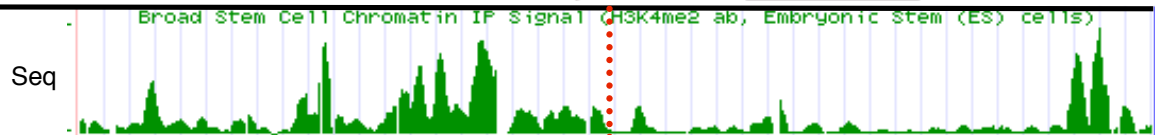

H3K4me2

PCR

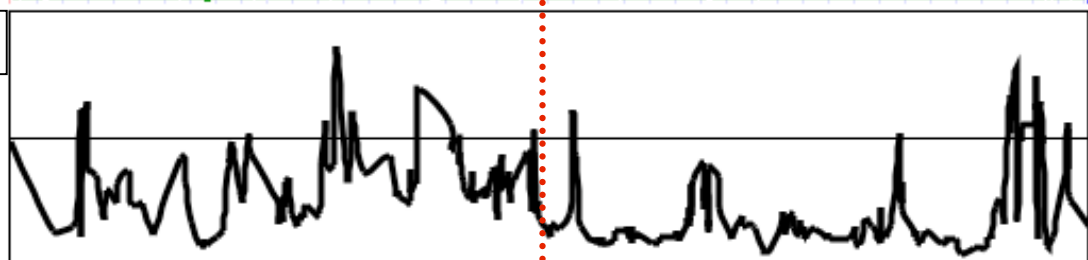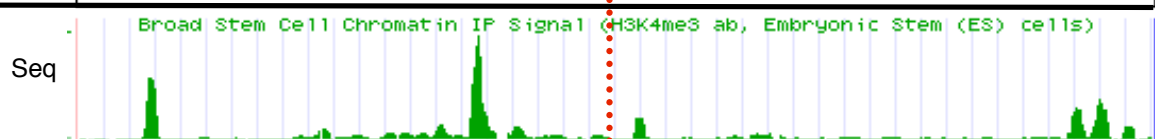

H3K4me3

PCR

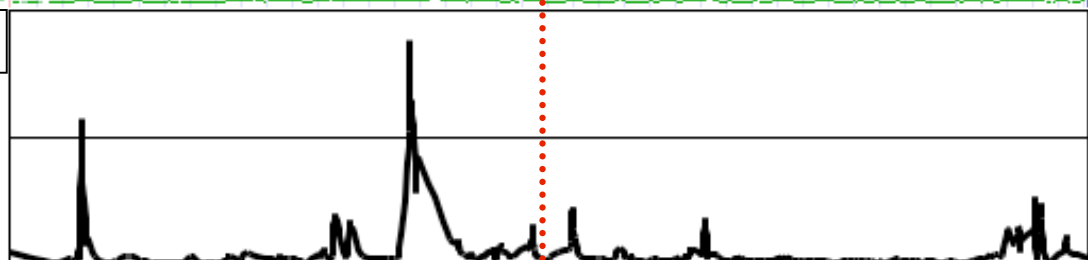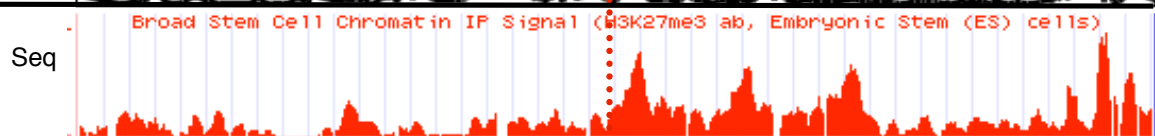

H3K27me3

PCR

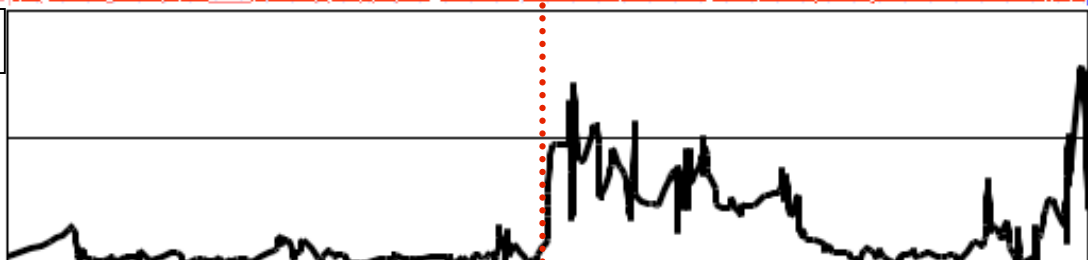

Supplement: 1756-8935-2-8-S5.pdf [file 1756-8935-2-8-S5.pdf]
