# Supplementary material for: A role for non-coding Tsix transcription in partitioning chromatin domains within the mouse X-inactivation centre
Source: PubMed Central journal article supplement (PMC2720958; doi:10.1186/1756-8935-2-8), 2009-07-20
Supplement: 1756-8935-2-8-S7.pdf [file 1756-8935-2-8-S7.pdf]

| Region COORD | Fwd                       | Rev                      |
|--------------|---------------------------|--------------------------|
| 48           | CTGAGAGTCCCAGGAATGTGT     | GTGGAAGCATTTCGTGGGTA     |
| 248          | CAGCCACTTAAGCAGAGGC       | AGCGATCCTGTCCAGATGTC     |
| 11822        | TCCCAATGATGCTTTGTAACCTT   | GATAGGATTGATCCTGTGGCA    |
| 16873        | TCCTCCTGTCGTTFCAGTGC      | GCAAGCACAGTCAGATCAGC     |
| 18101        | GCCACTGACAGATATGAACCAG    | CAGGTCGGTAGTGACTTGCTC    |
| 19282        | GGGAATGACATATGCGTACCTT    | TGTCGTGTTAATTAATGCGGGA   |
| 19492        | GGAGTTCACCTCTACCGGC       | CTGCGTGTGGGTAGATGG       |
| 19987        | AGCATCTGCGGAGATATGC       | CCTCAATGCCCTTCTCATTC     |
| 20086        | GAATGAGAAGGGCATTGAGG      | CCTATTCAACCTGCGGTTTT     |
| 20142        | CTCTTAGCAAAGGGCACCTG      | CTCTTTCCCTCAGGGTCGATG    |
| 20397        | CTAGTGGAAAACGGCGACTG      | TGGACAAATATGTGGGTGGA     |
| 20974        | AAGTGTGCAAGGACTTCTTATCA   | CAAGTATGTGCAATCCAAGCA    |
| 21063        | TGCTTGGATTGCACATACCTG     | TGTGACTTGATAGGAAGGCG     |
| 21095        | TTTGAATATGGTGTCTGTTCAT    | CAAAGGGACTATGTGAGCCA     |
| 21342        | TGTTTGTCAATTGTGGAAGGC     | GGAAGTTGGCACCTGAACAT     |
| 21499        | TCACTAGGGAGACCATTATTCAA   | ACGAGACAGCAAGTGTGGTG     |
| 23617        | TGCCACCTTAACTGTGAAGAA     | AATATACACCGGGCAAGCAC     |
| 26214        | CAATCTTTGACAACCACCAGC     | AGACAAAGAGGCACCTGGGA     |
| 26400        | TTCATAGTTTCGCTTATGAAACAGA | GCCTTAATTTCTGAGGCTTTCA   |
| 29386        | AACAAGTTTGATACCGAATTTCC   | TTCAATTACCAGTGAGTCAAAGCA |
| 29573        | CATGACTACCAGCCTCTGGC      | CAATTACAGTACCTTGC        |
| 32319        | TCCAGCTAGAAAGTCAGAGGC     | TAGATTCCGCGGTTATCCCAA    |
| 33310        | GTTCAGTCAATCCAACCG        | TCACCTTAAAGCTTGTCCCTA    |
| 33941        | GGATTCTGCGAGGCCCTTAG      | CCTTTTTCATTGCAGGGAATC    |
| 36460        | GCACCATTGCCTTAAACAAGAA    | CATGGTTCAAGAACTTCGCA     |
| 36504        | TTCCAATCAGTCCCTGTTGCT     | TTGGAAGACTTAGCGAGTAAAGC  |
| 36568        | TTATGCGAAGTCTTGAACCA      | AGGAAGACGCCTTATCCCAA     |
| 36677        | TTGGGATAAGGCGTCTTCCT      | TCAAGCATGAGTTCACACGG     |
| 39510        | CTGTGGCCACTACATAGGCA      | ATATAAGGGTGGTGGCGTGA     |
| 39520        | GTGGGTCCAGTCAGTTTGA       | ATATAAGGGTGGTGGCGTGA     |
| 39611        | TCACGCCACCACCCCTTAT       | TGCTTCATAAAAACACGGGAA    |
| 47394        | TTGGTGAGTFTCCGACCAGT      | AGAGGGATTTTGCCTCTGT      |
| 48284        | CCCATTCCCTCACATCCG        | TGCTAATTCCGGGTCTCA       |
| 50119        | CCACATACCGTTTATTGCG       | GCAAAAATAACTTTGGGTGGT    |
| 52646        | CGACCCGACTGAGGAGTTT       | TTGAACACAGCGAAGGAGAC     |
| 52743        | GACAGTCTCCTTCGCTGTGTT     | AGTGCAAAAACAAGCCTCA      |
| 53840        | GCCATGGCTTATCCTCTTCT      | CCAATCAGACGGCTGAAACT     |
| 54175        | TTCAACTGCAAGTGAATGCC      | GCTTGTTCCGTTCACTGAGA     |
| 57243        | TTCTCGGATCTGCACTTGGT      | TCTACCAGGCATTGGGTTCT     |
| 58895        | CATCCAGATAGAGCTGGCGT      | TGGTTCGACAGACATAGCCA     |
| 59154        | TGCTGCTTCTGTCTGTGTTCT     | AAAGCCACACGGTTCAACTC     |
| 60997        | GCCCCGTCCAATTTACAAC       | TTTCCACCTAGAGCCAGAGG     |
| 61016        | CCGGGTGGAGAGTTCCTT        | TCAGTTTCCACCTAGAGCCA     |
| 61056        | AAGTAAACTTCCCTCCCGGT      | TTGAGGGTGGAGACGCTAGT     |
| 61447        | CTGTCAACCTGCATTATTACTGA   | ATCTCAGCAGTTGCCAGGAG     |
| 63666        | GATGCAAAGCTCATGCGTTA      | CAGATTTGCACACCATGTGA     |
| 64422        | TTGTCCCTCGTTTGTACC        | GAATAGCATCCCCAACGTGT     |
| 66565        | AAATACCTATCAACGGGCCCTT    | CGTGTCAATATTAGAGCCCCAAA  |
| 66911        | AAAAGGCCGAGATGAGAA        | TGCTAGATCTCAAAGGCTTGAA   |
| 74332        | CAAGCCGTTAATGTAAGCGA      | GTACTTGCCAAGCCCAGAAG     |
| 74762        | AGGGTACTACAGAAGGCTGTCA    | ATGCAGCATATAAGGTGGGC     |
| 74847        | CCAATTCACAGCCCACCTTA      | TTTATGCCTTCTACGGGTGC     |
| 75008        | GGACAAATCAACCCCTCAAT      | CCTGAAGGTTTCGTTGTGGTT    |
| 75435        | CACACCCCAACAACAATGAC      | ACTCACATTGGTCGGAGGAC     |
| 75518        | GTCTCCGACCAATGTGAG        | AGGACACGCTCAAGTGTGTG     |
| 75545        | TCGATACTTTAGAGGCTTGACA    | ACTCTTCTCCAAGTGTGGCG     |
| 75601        | CACACACTTGACGTGCTCCT      | C TTCGTTGGGTCCGGTACTA    |
| 76361        | TTAGCCTGCTGCCACAAAG       | GGAATGAACGACAGGGCAT      |
| 76444        | CAGACCTGTGCACCACCA        | GCACAACCTGGACTCGATTTTC   |
| 76521        | CTGGTGCTCATTACAGATCCA     | GGCTGCCCTATGTTCTTCTT     |
| 76627        | ACATAGGGCAGCCACCT         | GTGCTTCCCTCATTAGAGGGC    |
| 77361        | GGACCTACTCCTTCATGCCA      | GCCTATCTTCCATGGAGGTCTT   |
| 77518        | ATTCCCAATACCCGAGGCT       | TGTGAATAAAGGCCTGAGGG     |
| 78140        | AATGTTCCAGTATGAGCCTGC     | TGTTGTTCTTGAGTAGGTCCTTCA |
| 79702        | TCCAATCTCCAATACTATTCCA    | GAGCTTAAACTGCTGGGTGC     |
| 79900        | ACAGATGATGACACCGACGA      | TTCTTGTTCACTTGGGTGGA     |

|        |                          |                          |
|--------|--------------------------|--------------------------|
| 81407  | CAGCAGTACCAGATGATGAGG    | TGTTTAGAGCTTATCCACCCTTG  |
| 82169  | CCCCAAAATTTCCCTTGSTA     | GAACTGTCCACCGCTCTTTCTG   |
| 86069  | CAATCCACAGCCAGTCCCTACT   | GCAGAGCCGTGGGTCTATTTC    |
| 86095  | GAGATCCTACCTCTTAGGCTCTGA | CTCCGTTCTGCCAAGTCCT      |
| 87354  | AAAGATGTTTCACGAGGGAGG    | TGGTAGCTGATGGTGACACG     |
| 87438  | AACTGATTAAGCAGGCAGGC     | TGTTTTCGGCTTAGTGTGTAGAGA |
| 87452  | CGTGTCACCATCAGCTACCA     | GATTTGTTTTCGGCTTAGTGTG   |
| 87637  | TGAAAATCACCGCAAAACAA     | GAAACGCAAAGGTTTCAAGC     |
| 89700  | TTCCAGATCACGTCACCAA      | ACCTCACTCCAGCAATTTCC     |
| 90647  | TTACTCAGCCGATGCCGT       | AGGCAGCAGTTCCTTGCTAA     |
| 93265  | CAGCCTATCACTCAGCATTTTG   | TCTGAAGTGTGCAATGTTTAGC   |
| 94781  | CAGTGACAGGGAGGCCG        | GGCATAAATCACCGCATCTT     |
| 94790  | TGGCAGCATGTAACAATCAGA    | GGCATAAATCACCGCATCTT     |
| 94879  | AAGATGCGGTGATTTATGCC     | CTATTGCCAGACAGAGCCT      |
| 95019  | CAGGGTTACCTAGACACCAAGTG  | TGGAACACCATAGTAGGCCTTAG  |
| 98033  | TTCTTCGGTAAGAATCTGCCA    | CTGATCCCCTTACTCTGCTCA    |
| 105245 | TCTCACTCAACGGAGCTAGATAAA | TCTTTGGTATGGGACAAGCC     |
| 106981 | TTGTTACATTCACCAGACAGA    | GGCGATAGAGACAAGGTGCT     |
| 107496 | GAGTACTCCCACATGCACA      | CAAACGACTAACCAGTCAACAA   |
| 108139 | TCAATGGGCCTCCTGAAGT      | TCCGGCTTTGCCTATACATC     |
| 110843 | GCCTCAAGAGCCTTAGGTCC     | GCTTGCAGGTACTTTTGGGA     |
| 110990 | TTCTCACTTTCGAGATATCCA    | GCTGGCTATCACGCTCTTCT     |
| 111085 | AGAAGAGCGTGATAGCCAGC     | CCACCCCAACAAGGACTTC      |
| 111129 | GGCTTAAGGAGAGGGCAG       | TATCCCGCAAGAATTTTCAGC    |
| 111475 | TCCGAAACCGATAGTTAAAATG   | CCACCTGTAAGGGACAGACA     |
| 111640 | ATGGCTCAAATGGATGCCT      | TAGTGACCTCCAGTACCCG      |
| 111838 | TGGGAGGTCATAAAATGCC      | TGATAGCCCAGATCCTCGAC     |
| 112756 | GCGTAGAGATGGTTGGCTAAA    | CTGCTACAAGTCACGCCCTT     |
| 112868 | CGTGACTTGTAGCAGGTCTA     | ACACGTGCGGTGAGGTAGTA     |
| 112973 | CAATACTACCTCACCGCACG     | AAGCGGAGGTAGAATCCCAT     |
| 113178 | CGTGTGAAGTAACCAAGAACGA   | AACGGAACGCAGTACCAAAA     |
| 113273 | ATTTTGGTACTGCGTTCGGT     | CCGAAAATACTCCTTGTCCT     |
| 113289 | CGAGGTACATAATGACCCGAT    | CCACCCCGAAAATACTCCTT     |
| 113423 | TCTCAGTGGTTCGTATCTGAAAA  | TTAGTGCCATTGTTTGCTCG     |
| 113482 | CCCTCCCGGTAGTGTTTTATTC   | AATCCGCATCAAACCAAAG      |
| 122239 | CCCAATCCTTTAGTTGCCAG     | ACTGCAAGCGAGTGTGAGTG     |
| 122254 | TGGTAAGGTTTCATGGGCTT     | GGTACTGCAAGCGAGTGTGA     |
| 122417 | TTGTTGGCTCCTTGTATTAGCA   | GAAGTGCTCCAACAAAACCG     |
| 124480 | TTGGTCTTTCGTTCCCTCCAG    | TCAAGGTGGCTTGCTATGGT     |
| 124746 | CAGGATAATGCAAAGTAGCCTAAG | AGTTACAGAAGCCCTCCACG     |
| 124843 | CGTGGAGGGCTTCTGTAACT     | TGCAATGTGAGTCCCTCATCC    |
| 125093 | CCTTGTAGAACAGGCGAACC     | GCTCAAACGTTTTCTAGACTGAAG |
| 125327 | GAACCGAGGAAATAGAGAACCTC  | CATCAAGGTGTAGAGGAGGCA    |
| 125417 | TGCCCTCTACACCTTGATG      | AAAGGATGCAACCCAAAGTG     |
| 125765 | GCTTCAAGCTAGGCCAATGA     | GTTTGCGAAACCAACCA        |
| 126635 | ACTCCCTTGCACAAATCCAT     | TTGAGCGAACACATAGATTGC    |
| 127710 | AAATTAAGCATTGGCTCATTCC   | GATGTATCCGATATTGTTTTGGG  |
| 128177 | CAAAGCATGTTATTCCCTAGAGCA | TGAATACGTA AACCATGAAGCC  |
| 128356 | CACAGCCTTAGTATTTCAGCACAA | GGCACACTGGTCTATTGCCT     |
| 128763 | TGAAATGCACCAAATTACTCG    | CTTTGGGCTTAGGTGAGCAG     |
| 129123 | GGCTATATACACTGGCTGGATTT  | GCTGGATAGTATTGTGCAAGGG   |
| 129257 | AAACGTATTCCTTTATGGGCAA   | ATTGCAAGATGAGACCTGCC     |
| 129476 | AGGATTGGGTCTTAGGTCTT     | GAATGCTGACAACCCAAAGAA    |
| 129552 | TCACAGGTGTCTGTAGAAAACA   | CAGAAGTTTTGCGACTTGAGA    |
| 129709 | CCGGACGGAATGATGTATTT     | AGGAGCTTCATAGCCCTTCT     |
| 131843 | CGTGAAGCCTGTTCATCTTC     | CACTAGCATTCAGCTCTCTGAG   |
| 131901 | TTAGATGCTCTCCACCCAGC     | AAATGACCCGAGGATCAACA     |
| 132457 | TGGCATGAGTAGGGTAGCAG     | ACCTTCGAGGAAGCCATTCT     |
| 132811 | TAGGCCTGTTGCCAGTG        | AGTGCTGGCGACCTATTCC      |
| 133726 | TGTTTCAGAGTAGCGAGGACTTG  | TCACAGGGACAAAACAATCCC    |
| 134057 | CTCCAAATTCATCCCTGGAA     | ACCACCAATTGAAAACGCTG     |
| 135047 | TGGGTCAGGACACTAATTTGG    | TGTCCATTAGGAGGTGCCAT     |
| 135111 | AAGATGGCCTCCAGATGGTT     | CCTCCACGGCACTGTAAAAT     |
| 135130 | ATGGCACCTCCTAATGGACA     | GTCTTACATGACCTCCACGG     |
| 135700 | CCTGCTGCGAAGGAATTTAC     | CATCCTTGCTCATAACACTTAACA |
| 136360 | CAGCTAAGCATAATGCATGGAG   | CCTTGTTGGTCCAGACGACTA    |
| 136524 | TTTCAACCCCAAGTAGACTTCC   | CAAATTTCTTCCGTGAGATGA    |

|        |                          |                         |
|--------|--------------------------|-------------------------|
| 136683 | GTGTACCCAGCATAATGGC      | GTGCCACCCACTGAAAAGTC    |
| 136789 | TGACTTTTCAGTGGGTGGC      | TGCTCCTCCGTTACATCAGA    |
| 136807 | CAGAAAAGAACTCGAATGAGAAA  | TCCTGCTTGAACTACTGCTCC   |
| 137242 | GACCTAAGTACTCGGCGGCT     | TGCCAGGATCTAATCATTCTTT  |
| 138327 | GAATTCGAGGTGTCTCTGTTC    | AGTATTGACTGGGCAAAGCC    |
| 138436 | GGCTTTGCCAGTCAATACT      | TTGTCCATTGACCACTTTTCTG  |
| 138648 | AAATCCGGGTCATTGTTGG      | CACAATGGCAGTTCTGGATG    |
| 138838 | ACAGTACCGGGTAGTTTCGG     | TCAAGGCTACTGAGTCCCAGA   |
| 138994 | TTGCATAGTAATCATCCAAATGC  | TTACACATATGACCTGTGCGG   |
| 139507 | TGAAAGGCGAAGGAGTATGG     | CCTGCAAGGGATACCGTTTA    |
| 140352 | GGAGTCTGTATCTAAAAGGCA    | TGCATCTGGTGAAGACTTATTTG |
| 143748 | GCAAAGCCTGAACTGGTATAGAA  | TCCACCGAGTACTCTTCAA     |
| 144094 | ATGCAACCCAGCAATAGTC      | CTTTGGCCAGAGTCATAGTGG   |
| 144233 | GCTTGAGATCAGTGCTGGCT     | AGTGCTCTATACGTGGCGGT    |
| 144266 | GGCCAAGGTGTAAGTAGACTAGC  | GGACATTTGACTCATCCGCT    |
| 144324 | GAGTTTTAGTTTGCACCGCC     | CGATGTAAATCATTGAAACCTCA |
| 144379 | GCGGATGAGTCAAATGTCCT     | GAAGTGTGGATGATGTCCG     |
| 144486 | GATCCGACATCATCCAACACT    | AAGGACGTGAGTTTCGTTG     |
| 144732 | TTACGTCAAGTGCCAACCAA     | CTTTAGCTACTTGGCGGGCT    |
| 144908 | TCCGCCATCTTAGACACATTC    | CTCAAGTTCTTGGTGCGGTA    |
| 144990 | GCGTTATACCGCACCAAGA      | GCTCGACAGCCCAATCTTT     |
| 145021 | CGCCATCTTTTCTGTACG       | GTCTATAAAATGGCGGGCTG    |
| 145216 | ACCCACCTGAGCCCTAT        | GATTCGCCTTGATTTGTGGT    |
| 145292 | TACTCCGGCTAGCACAACC      | AGCGGACTGGATAAAAAGCAA   |
| 145321 | ACCACAAATCAAGGCGAATC     | GCCAAGAATTAGGACACCGA    |
| 145344 | GCAACCCCGCACATATAAAG     | ATACGGCTATTCTCGAGCCA    |
| 145400 | TTTATCCAGTCCGCTGTGCT     | AACTGAGTGGGTGTTCAGGG    |
| 145421 | AATTCTTGGCGTAACTGGCT     | TTGCTCTTAAACTGAGTGGGTG  |
| 145454 | CGAGAATAGCGTATCACGC      | ATCGTTTGGTGTGTGTGAG     |
| 145496 | CCTGAACACCCACTCAGTTTAAAG | TGCCTCTTATTTGCGTGTACTG  |
| 145643 | ATATTTCCATCCACCAAGCG     | GCCTCGGATACCTGCTGTT     |
| 145693 | GTATCCACAGCCCCGATG       | CCTCGGATACCTGCGTTTAG    |
| 146340 | ACATCCACGGGAAACGAG       | CAATCTTTGTGGCCACTCTT    |
| 146446 | TGCAATCTGCATCTTATTGGA    | GAAATTCACGCGTCACTGTC    |
| 146557 | ATTTTGCAGGATAATGAAGG     | TGCATAGACAGGTGTGTGACC   |
| 146832 | AGTTGTGACGATTTGGTGG      | TGCTAGCGAGTAACGTACTTCAG |
| 147131 | CAAAGGATATTGTTGTCTCGTTG  | TGGCACTTTGATCGTCCATA    |
| 150170 | GAATGGGTGGACACAGTCAA     | CAGAGGTACAGGTCCGGAGT    |
| 150233 | AACTGGTCTACCCACGAGC      | TAACACCGTTTCTCTGCCAT    |
| 150248 | CACAACCTCCGACCTGTACC     | GGCCTAACACCGTTTCTCT     |
| 150283 | CAACTGTAGTGCAGGAGTTGGT   | ACCTGGCAAGCCATACTCTC    |
| 151066 | CTGTTCTTCCACTTGCCACA     | ACCATCAACTTGCATTGCCT    |
| 152369 | AATAGGCCACTGGCAGTTTG     | TCGTTGAACCCCTTCTATGGC   |
| 152678 | AGCTGCTGGAGGTGTAATGG     | GCTTTGGCAGCTTCGAGTAT    |
| 152884 | TGAGCACCAAATCAACCTGA     | AACCACACGCAACAGCAAC     |
| 152930 | GGAATGGGTAGCCCTCTGTA     | TCCTCGATATCATCTTGGC     |
| 155712 | AAATGTGCTACCTTCTGGAGAGA  | ATGTTGGAAAGTTGCCGAAG    |
| 156036 | CCTCGTGGTGCAATAGGTAAA    | TCACACCAATACTGGTTACCACA |
| 156190 | TGAGGTGTCCAATAGGAATAGG   | ACAGAGGCTAGGTGGCAAAG    |
| 156493 | TTAAAGACGGGCAAGAAACG     | CAACGTGACCGGGACTGT      |
| 156662 | ACAGGGACTGTTGCGCTGT      | TAATCCCGGGAAGGACGTAT    |
| 156738 | ACTTATAAAATGGCGGCGTC     | TCACCAGGGCATGTTTATTA    |
| 156764 | ATACGTCTTCCGGGATTA       | CTCTCTGACAGCGCGAGAC     |
| 157016 | ATGAGTGATCAGTGCCACA      | TCCGTCAAACCCCAATTAGA    |
| 157029 | GACCTCCACGGATGAACCT      | TCCGTCAAACCCCAATTAGA    |
| 157270 | TTTTGCCCTATGCCCTTTT      | CAGATCACCTATAAGGCCCC    |
| 158862 | ATAGCAGCCGAGACTCAA       | GCTGAATCAAAGTCTGAACC    |
| 163184 | TGAAGGACCTGAAGTCAA       | AATCAAGAAACGTTACCAGGTT  |
| 163267 | GGAAACCTGGTAACGTTTCTCTT  | AGTCCAACCCACCTTGACAG    |
| 164083 | CTGGACCGATAGTTGGGAAG     | ATGCCACATAGCCTACAGGG    |
| 164224 | GAGTGAGCCCCAAACTTGC      | AGGCCTCCATGATGTGTGAC    |
| 164243 | CTCCGACTTAGCCTCCTCT      | CCAGGACAATAAAGGCCTCC    |
| 167885 | GAGCTCTTGTTCACGTAACCTG   | ACCAGCAGATGAGGCACACT    |
| 167936 | TGCTGTACTGTAGTGCTCCTTAGC | GAGTAGGGAGCAGGAATCCAC   |
| 168029 | ATTGTGTGGTGGATTCCTGC     | ATCTGACCCTGGTGAATGGA    |
| 170043 | GCAAGATCCGACACTCAG       | AACTGTAGGGCACTTCACGG    |
| 171391 | CAGCTAGACCGAAACTTTCCA    | ATTCCACATGCAACCAGTCA    |

|        |                          |                          |
|--------|--------------------------|--------------------------|
| 171486 | TGACTGGTTGCATGTGGAAT     | TGTATGGCTTGGCGATAAGGA    |
| 172427 | CCCTTCTACTCCACGTGCT      | CAACTCATTATTGGGTGGCA     |
| 172782 | AGGGCTTAGAAGCCACTGAG     | CTGGTGCGGGTGCTTAAA       |
| 172876 | TTTAAAGCACCCGCACCAG      | GATGTGTACTGCAAGACGGC     |
| 172929 | CCCAATTTGGTAATGTCAATCA   | TAATGCTTTAGGCCAGCCAC     |
| 172960 | GCCGTCTTGCAGTACACATC     | CCTTCCCAATGGCACAGTAT     |
| 173019 | GGCTGGCCTAAAGCATTACC     | CTCAGCTACCCCATCATTGAG    |
| 173147 | AGATAGCTTGCTGCATCCGT     | GCACAGTAGCAGTGCTTGGAA    |
| 173754 | TCCAATCTCCGGTTAATTTTACT  | AGTTTGTGATCCATGGGAGG     |
| 173770 | GGCAAAGGTTGATGGAACAC     | AGTTTGTGATCCATGGGAGG     |
| 174074 | TGGCATGAAAATCCGACTCT     | CTATACTGAGCCCGTAGGGTG    |
| 174091 | TCCATAGCTTTTTGGGTGAG     | GTCTATACTGAGCCCGTAGGG    |
| 174178 | ACCTCACGGGCTCAGTATAGA    | CCTGGTCTTTTTGGCAGATA     |
| 178119 | TTTCGAAATCATCATCACGC     | GCTGCCCTCTTTGAAACATC     |
| 178149 | GCTGCCAGCTGTCAAACA       | CCATGAAGCTACCAAGCCAT     |
| 178907 | TGCTAATGCATACTAGGCTACCA  | ATAGCTGTGCAGGCGAGTTT     |
| 180396 | GGGCAGCCGTGATTATTCT      | CTCTCCCATAGCAGGCAGAC     |
| 180522 | AAACCCTACTGCCAGATGGA     | TCTTTAGCCCATGCTTCACC     |
| 184495 | GAATGGTAAGTAATCCGGAGGAG  | AATCCTGTGCTATTGTGGC      |
| 184731 | CAGGAAACGAAGGGACCTG      | CCTTACAAGGATAGGTGAAGGAAA |
| 185376 | CAGCCATTATCTACCTGGC      | TCTGTTCCCGAGGTTCTGTG     |
| 185924 | GACATGTGTCTACTCTTACTGGA  | GCCTGTTGTATTGCCTTGTT     |
| 186034 | GCAATACAACAGGCAGCAGT     | GAGCATGTGCTCACGTTTAT     |
| 186064 | ACACATCAGCAAACCCGAG      | TGTGTATGCCCTTTGAGCTG     |
| 188026 | ACCGCAGACAGCAGAACC       | GAAGTTGAATGTTGCACCTCA    |
| 188112 | TGATGAGGTGCAACATTCAA     | TGCACCAGAAATCCTAGCGT     |
| 188705 | TTCTGGTGGTCCAGACAAT      | TGGATCCACAATTACAAAGCA    |
| 188733 | ATTAAATTCACGCCTCTGCTT    | CCAGGCCAAACCTCATAAAA     |
| 188751 | CATTTTCTCTAGACCTGCCA     | CTTATAGTGCCACCAGGCCAA    |
| 188837 | TTTGGCCTGGTGCACATAAA     | ATAGATCGCGCCAGCATTAC     |
| 188900 | TGTTTTACGATGCAGCTTTTACA  | GGAAGAGCGTCTCATTCTCT     |
| 189110 | GCTAAGTTCGCACTGGCAAT     | GTGACTTAGTGGGCCCAGAG     |
| 189220 | AGTCACTTTCATGGCGG        | TTTCGCTTCGAGGTCTCCTT     |
| 189250 | CAAACCTGTAGAGGGCAGACA    | CCGAGTCTCCTCAACTCACC     |
| 189427 | GGGTACTGTTCAGGCCCTAAG    | CCTTTGCCTAGTGGCTTGTG     |
| 189640 | GGCCTTTGCCAACCTTTT       | CATCTGAACCGCAGCTTTC      |
| 189728 | GAAAGCTGCGGTTTCAAGATG    | TCCAGTTCAATGCGGATGTA     |
| 192652 | TCAGTTTCGGTTCCTTAAAGTTTG | TAATCAACTGTGGTGGGCAA     |
| 192811 | GAGTGGACTTCTCTGGGATGA    | GTTGAGGTTATGGCCTCGAA     |
| 192916 | GGCATAACTCCAACTATACAGAA  | TGTGCAGCTGCCAATCTACT     |
| 193017 | GCAGCTGCACAAGATAGGC      | AGGCTGCGTCTTCTTCTCT      |
| 193114 | AGAGGAAGAAGACGCAGCCT     | CCTCTTTATAGGGCGTTGCG     |
| 193127 | GCAGAAGAAGTCTTGAAGCAG    | CCTCTTTATAGGGCGTTGCG     |
| 193209 | CGCAACGCCCTATAAAGAAG     | ATGCAAATGCTTGCCTGTAG     |
| 194023 | ATGGAACGCACTGAATGTGA     | TATATGGACCCAGACCCTGC     |
| 194058 | CTTCATGCACCCAGAGTGTG     | GGAAGGATGGTCAAATCAGC     |
| 194107 | TATTGTGCATGCAGGGTCTG     | TCTGCTCCTTAGCGAGTTTCT    |
| 194159 | GCAGCTGATTTGACCATCCT     | CCTGATGTATGCCAGGTCTGT    |
| 196761 | CTTCCCCTGCAACTTA         | TCAGAGAGCGATTTGGGAC      |
| 196867 | GTCCCAAATCGTCTCTGA       | TGGTGATTTAATGATTTGGTGC   |
| 196881 | CTGCTGCTAGTGGAGGCTGT     | TGGTGATTTAATGATTTGGTGC   |
| 200588 | CTTGTCTCAGATTGAGTTAGCA   | CAATGGTTGTTGATGCAAAGA    |
| 200613 | TGACTTGCCAGTTTGTAGGA     | ATATCCCCTGACCCCATAACA    |
| 203508 | GGAGGAACCTTTCCCCTGT      | TGATGATGGCAGGTAGTAACG    |
| 203561 | TCCCGAAGAGCCTTTGTATG     | GGTAAATTTGGCTAGCCCTCA    |
| 204448 | GCCAGATACTCATCTTAACACACC | GCCTAGCCCTACCTCTAAACC    |
| 206341 | TGACTTTGCAGGTGTCTTGC     | ATTAACAGCCGTGGAACACC     |
| 207030 | TCTTGGTGTCTTAGATCTGCT    | GAGCCTACGGTGAAAATACAAA   |
| 210140 | TTGGACTACTGATTAACACCAGG  | CAAAGAATTTCGACTATGCCCTC  |
| 214271 | CTGCAACAGACTGTGCTGAC     | GGCAGTGCAGGATTGAGTTT     |
| 214698 | GCTGCAATCTGCCTCCTAGT     | GCTGGTTGAGCCAGAGTCTAA    |
| 214807 | CTGGAGGCCTGCTAGAGACA     | GAATTTCCCGCCTGAAGTAA     |
| 215514 | TGAGGTCAGATGGGTCTCTTTT   | TGAAGGAGTCTACTGGGAGCA    |
| 215761 | TGGAATGCCAAATGAAGTCC     | CCTGGTGAGACGGTCAGTTT     |
| 215819 | ACACCAATCATGTAGGTGGAAG   | CCAGGCCTACTCTTCTCAA      |
| 215832 | CAAGACATGAACCCACAGGAA    | GGTCCCAGGCCTACTCTTC      |
| 216306 | CAGAAACGAACAGATTTATGCTCT | TTCTGGGAGGTGGCTAAGG      |

|        |                           |                          |
|--------|---------------------------|--------------------------|
| 217547 | CAGTGGAGAGTTCTTCGCACA     | GAGCATAGGCTCAGCCCC       |
| 217589 | CGAAGACTTTAGCATTTCTCTGA   | TGTGTTGCTGACTTGGACACC    |
| 219464 | GGAAAGGCTGTCAAACAACCT     | AATCTCCTCATGCAACACCC     |
| 219477 | AATCCTGGACTCGGACCATT      | AATCTCCTCATGCAACACCC     |
| 219558 | GGGTGTTGCATGAGGAGATT      | GAGTACAGCTCTTCTGCTCGAC   |
| 219722 | GGGAAGAAGTTACTTTACCGACA   | AAGGTTCCGGACCTGAAATCC    |
| 220703 | GCCTGGGTTACTTACTTTGGC     | AGGCAAAGCCCCATAGTGTT     |
| 220785 | GCAAAGTGGGTGAGAGACTTC     | CTGCGGCAGGTTTACAGTCT     |
| 220840 | GCCATCCTGGCATGAGAC        | CGAAGAGGTGGCCTAAATCC     |
| 220854 | GGGCTAGAATGTGCCACAAG      | CGAAGAGGTGGCCTAAATCC     |
| 221540 | CTTCTTGGTTATCACCCGAG      | TGATTTACCAGGCTATCGGG     |
| 221573 | GAAGATGAGGGACAACAGGC      | CATATGAGGCTCGAATTGGG     |
| 223668 | TTGGCTAAATGGATTACGCA      | TCAATCTCTGTCAAAGCCACA    |
| 227051 | AGTGGGCAACTGTCTTAGCG      | TGCATGCGATGAAAAGATGA     |
| 227063 | ATGGTTCAGGCAGCAGGA        | TGCACTGCGATGAAAAGATG     |
| 227148 | ATCTTTTCATCGCAGTGCAG      | ATGTCTTTCACGCCTTTCC      |
| 228020 | GGGAAAATTAGCTAGGGCATC     | GACCAAGCGTACTGTTGAAGG    |
| 228913 | GCAATCTCATGCATTGGTGA      | TGCTGGACATAAGGGTCTAGG    |
| 233183 | TGATCATGTTACGTTCACTGAGG   | CCAACACCCAGTTGACAAGA     |
| 234664 | TGTGGTTACCTCGGACAGTATTT   | TGTCTGAAC TTC AACGCTGATT |
| 234827 | AAGTCGTTTGAGGACGAACTG     | AATTTCCATTTCGCTGTTTGG    |
| 236136 | ACAATGTGCACCCGATTAGG      | GGTTGTATTATCATTGTCCGAGG  |
| 236203 | GGATTAGTTGATAGACGAGAGCC   | CAACCTGGAGTGGTGTTCCT     |
| 236217 | CCTCGGCAATGATAATACAACC    | CAACCTGGAGTGGTGTTCCT     |
| 236250 | GTGCTAGAACAACCTTAGCAGTTG  | GCCTTGGTGATCAGGAGAAC     |
| 236662 | CAACACCATTGACCATTCAA      | GGCCTGTTTTGTTAATTGCGT    |
| 237771 | CAGACAATCTGGTATAAAATCGTCA | GGACTGCCAGAAAATGGGT      |
| 238513 | CCTCACTGGAATGCATCAGA      | CCTTAACCGCTTTGATGGTC     |
| 239850 | AAATGATGCCCATACCCTTT      | ACCACCAGGCATCTTGGTAA     |
| 241320 | AACCCTTACAAGATTGGTAGTGC   | GGTCAAGTAGGCAACAAATGC    |
| 241411 | GCATTTGTTGCCTACTTGACC     | ATGTGTAAGTGCCCTCCCTG     |
| 241945 | CTACTGCATTCAGGCTCATCC     | GGAGCTCCTGTGCATTAACC     |
| 241969 | CCCCTCCTGATGACAAGAGA      | TGATAATTCCGAGTTTGTGGC    |
| 242020 | ATTCTAGAGGTTAATGCACAGGAC  | TATGCATTCGCTTTGACC       |
| 242115 | AAGGTCAAACGCAAGATGC       | TTGCTTTCGTTCCCATAGAGA    |
| 242683 | GAACAGGCTCCAAGCTAAAGAA    | AAGTTGCCAGCTTATCAGG      |
| 243197 | TGCCTTGTCAAACAACTGGA      | TCAGCCTGACTGGTTGATTTT    |
| 245000 | TCAAGGCACATTCACGGAAGTC    | CACATGACTCAGCCCAACTG     |
| 247326 | CTACAAGGTCATAAACAAGGAC    | AGCTTAGGCATCTGCAGTTTT    |
| 247534 | GGTGCTAAAAGTCTGCCTC       | TGGATTGCTTAACAGTCAGGTG   |
| 247695 | GCAGGACCCCATATTATCCA      | GAAATTC TTTGGGCTTG TGG   |
| 247996 | AAAGCCAAGGAACCATCTAGG     | AAACTCGGAGACGTAGGGAAA    |
| 248075 | CCGTGCTTTCCCTACGCTC       | CAGTAAAGCTGGCGTCTTGA     |
| 248150 | GAAATTC AAGACGCCAGCTT     | GCCATGTGGCAGGTAAGA       |
| 251455 | GGAACAGGACAGGCTAGCAA      | CAAAGCCTCATCTCGCATT      |
| 251660 | GCAAAGCAAACTGTGTACCTAAC   | CATGGCCCTGTGCCCTTAAT     |
| 251782 | CCGGAACTTCTGCCATTCTA      | CCTGCCATAGGGAGGTAATG     |
| 251797 | TGTCTCCAGTCCAAACTACCA     | CTGCCATAGGGAGGTAATGG     |
| 253041 | GCCCTTTAACCTAACAGTCACTAA  | TGTCTATTTGTGCTGGAGCC     |
| 253080 | TATACCCGAGGGTGTTCCTG      | TGGAACCCAAGGTCAGAATG     |
| 254258 | ATCCACGCATCCAGGTAAC       | TATCTTTGGACCTGCCCATC     |
| 254531 | GGAAATATCCTAGGACCTGACAA   | AGCTCTCATCGCTCACCAGT     |
| 259063 | TCATCAACCACTTACCTACAGGA   | C TTTCCGTTTCGACTTT CAGG  |
| 259147 | CAGAATCCTGAAAGTCGAACG     | CACCAAATCATGGGTTGTTTC    |
| 260921 | TTTTCAGCAATCAGACTGTCTG    | CTGATGTGATTGAGGTCCCC     |
| 262817 | CAAAACCACCAACTAGTCTTGGA   | GTAGCCTCCTATCAAGGCCA     |
| 264566 | CCTGATTTCCCACTTAGCAGC     | TTGCCCTGAATTGCCTATATGT   |
| 268196 | CCCAGCTTCCGTTCCCTTAG      | AGCACAAGTCAGTTGACACGA    |
| 268630 | TGTGCTGAAGAGACAGTGGC      | CATTAACACAACGTGGCTGC     |
| 271059 | CCTATCTTTGAACGGGAGACA     | TGCCTTAGCCTTCTATGCAA     |
| 271278 | TGATTCACAAAAC TGGGCTC     | TGGAGGTAGGATACTAGCCATTG  |
| 271455 | ACCCATGGTCTAAGAAGGC       | ATAACAGGTTTGGGTCGCTG     |
| 271701 | TTCACCACGCACTACCTGTT      | TTCGTATCGGTGAGGCTACA     |
| 272456 | TTTCCATCGAATTCTTCTGTCA    | GCAGTGACTTCAACAGAAGTGG   |
| 272748 | CAGAGTGCCATGCTGAATGT      | GCTTTGGATTTGCCCATTAG     |
| 272776 | CCTTGCTCAACCCCTTGTA       | TGGACTCTATGTCTGTTGACCT   |
| 274191 | AATAATTTCTACGCGTGAACAG    | TTGCAGGGTATATATGCCAAA    |

|        |                          |                         |
|--------|--------------------------|-------------------------|
| 274915 | GCCTGCCTAGAGTACTAAGCCT   | GCACAGCCTACCTAAATACAACC |
| 276128 | TCCAGCTGGTATGCGAGAATAA   | AGGAGCAGTTGGTGTCCACT    |
| 276187 | TCCCTAACATACCCTCTCTGG    | CACACTTCCAGCGCAACTTC    |
| 276239 | CCTGTGCCACGAATAAATCC     | CCTTCAGATGCAGCAACAAA    |
| 277744 | AAAGCAGTCGGAGCCAAAA      | TATAAAGCCATGTAGCCCCG    |
| 278071 | GCCAAGGCCTAGTTGTGCT      | ATAGTGGGCCCATGCATATC    |
| 278123 | GAAGTTTCCCATTGACTGC      | AGATCTCCGCTGCCAGGTA     |
| 278207 | CTGGCAGCGGAGATCTTG       | ATCTTCTTGGCTCCTCCTT     |
| 279424 | GACATTC AATGGTCATGCTAAAA | TGTCTGGTCTACTTTACGTCC   |
| 279595 | AGACGTAATTCGCACGCAC      | TTGCTCCTGATCCATATACGC   |
| 280152 | CCCGCTACTACCTGACACT      | AACCATTTTGTGGCTCCAG     |
| 280183 | AGAGGCCGTAGACGCGAT       | TCTGGCCCTAAAGATCCCTT    |
| 280503 | AAAGCGTACTTTCACGTGGT     | CATGTCAGATGCTGCCACTA    |
| 280743 | CCCTGAGACTCCATGACGATAA   | CCATTAAACCAGATAGGGAAA   |
| 280874 | TTCTCAGGAATGATGGGTTTT    | AGAGCACCGGAAAGTGAAGA    |
| 281130 | CAAGTGTAGAGTCTCCCTTCAA   | TATGGAACAACCATGGAACG    |
| 281145 | AAATCTGGTAATGATTCTGGACAA | TATGGAACAACCATGGAACG    |
| 284925 | GTAAGCCCCGGGACACTT       | GAGCAAACCACCTCCTGAAA    |
| 285019 | TTTCAGGAGGTGGTTTGCTC     | CACAGCGAAGTGC GTTAAAA   |
| 285033 | GGTTTCAACCAATGTAGAAGCA   | CACAGCGAAGTGC GTTAAAA   |
| 285129 | TTAACGCACTTCGCTGTGG      | CATGTTGCGCTTCTAGTCCA    |
| 285140 | CAACGT TCTGCTACTCTGGTG   | CATGTTGCGCTTCTAGTCCA    |
| 285226 | GTTGGACTAGAAAGCGCAACA    | CCAGAATCTTAGTCTCTCCCTGG |
| 285262 | AAGCAATCTTTCGCAGCCT      | GAGTGGAGGGTGTGACCAAAA   |
| 285362 | GTTTGGTCACACCCTCCACT     | CGGTAAGTTGCTCTTCGCTC    |
| 285457 | CGATTTGAGCGAAGGACAA      | GTATCGAGAACTGCGCGTG     |
| 285614 | CTCTTACGATGCGCACTT       | GTAGGACTCTGTGGCACG      |
| 285660 | CATGCGTGATTTCACTTCT      | GTGGCGCTCAAGTACCCTT     |
| 285718 | CGTGCCAGCAGAGTCCCTAC     | GTAAGATAGGCGCGCTTTG     |
| 286036 | CCAAAGTTATGCCCCAGTGT     | ATGCTTTATCGCCTACGACG    |
| 286632 | TGACACAAGTTCCCTCCTCC     | ACTGCCTGCCGTAAGAATTT    |
| 286698 | CTTTACCTCCTGCTGAAGCG     | TGTTCATCGCCGTTAAGTCA    |
| 286719 | GCAGTTAAAATCTTACGGCAG    | GCAGGTTTCGTACCTGGTGT    |
| 286737 | AGTGCTTAGAGGGTGGAGG      | GCCGCAAGTATAGCAGGTTT    |
| 287982 | AGGGAGTGTGATGGAAAAGC     | CAACTTTGTTTCGAGATGTGAGC |
| 290084 | GATTGGACCTGCCTAATGACTT   | AAGTTTACGGCCATCTGGTG    |
| 293650 | AAGGCTTTGTGATGTACGTGG    | CCTGCCTAGGATGGCTTAGA    |
| 293691 | CCGTGTGCAAAAGTCAATTA     | AGATCTTCCGGT GAGCAGG    |
| 293812 | CACCGTACCCATGAGCAGTA     | CCTCTGGTACGACCTCTGTG    |
| 293880 | GGGAGTGTCTTAAGGGAGGA     | CACAGTCTTTGGCGTAGTGA    |
| 293892 | GAGGGCGAACAGCAAGAG       | CACAGTCTTTGGCGTAGTGA    |
| 294066 | ACCAGGCTAAAACGAGAGAG     | GATGTGCCCAAATTCACCA     |
| 294118 | TCATCTGGCTCGGGACTG       | TGGCCATTCTCACCACATC     |
| 294167 | GAATTTGGGCACATCCAGAA     | GGTAGCAGCTGACTTCGCTC    |
| 294248 | AGCAAGACGAGCGAAGTCAG     | TAAAGGATGGCGTTTAAGGG    |
| 294526 | TCAGATAGGGCACAGCCATT     | TCAAAGACGATGTTCCAAGC    |
| 294537 | GAATTTGGACACTAGTGGATCCTT | TCAAAGACGATGTTCCAAGC    |
| 297943 | TTTGCATCCCTTCAAAATCATC   | TCTAACCTTGAATGAGCCTTGA  |
| 300027 | CAAGTGTGGACCCCAGTAGG     | GGCAAAGGCCCTCATTACTT    |
